# Supplementary material
Source: Elsevier journal article supplement (https://www.sciencedirect.com/science/article/pii/S188558571630216X)
Supplement: mmc1 [file S188558571630216X:mmc1.pdf]

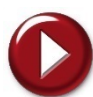**Supplementary material**

## **Epicardial Adipose Tissue in the General Middle-aged Population and Its Association With Metabolic Syndrome**

**Table of the supplementary material**

Mean Differences (95% Confidence Interval) in Epicardial Adipose Tissue (mm) According to Age Among Men and Women Without Metabolic Syndrome

|                                          | <b>45–54 y</b> | <b>55–64 y</b>   | <b>≥ 65 y</b>    | <b>P for trend</b> |
|------------------------------------------|----------------|------------------|------------------|--------------------|
| <b>Men</b>                               |                |                  |                  |                    |
|                                          | (n = 73)       | (n = 61)         | (n = 26)         |                    |
| <b>Crude</b>                             | 0 (ref.)       | 0.90 (0.31–1.49) | 1.74 (0.97–2.52) | < .001             |
| <b>Multivariable<br/>adjusted model*</b> | 0 (ref.)       | 1.07 (0.47–1.66) | 1.90 (1.12–2.69) | < .001             |
| <b>Women</b>                             |                |                  |                  |                    |
|                                          | (n = 124)      | (n = 75)         | (n = 29)         |                    |
| <b>Crude</b>                             | 0 (ref.)       | 0.68 (0.17–1.18) | 1.58 (0.87–2.30) | < .001             |
| <b>Multivariable<br/>adjusted model*</b> | 0 (ref.)       | 0.67 (0.17–1.17) | 1.54 (0.86–2.22) | < .001             |

\*Adjusted for sex, smoking, body surface area (tertiles), C-reactive protein (dichotomous), overweight, obesity, and waist-to-height ratio (dichotomous).
